# Supplementary material for: Synergistic Effect of Anti-Thymocyte Globulin Combined with Post-Transplant Cyclophosphamide for Dual T Cell Modulation in Haploidentical Stem Cell Transplantation for Poor Prognosis Acute Leukemia.
Source: Research Square preprint supplement (doi:10.21203/rs.3.rs-523536/v1), 2021-05-27
Supplement: Supplementary file 1 [file 3056173e216f144554037092.xlsx]

## Sheet: Sheet1
Treatment, (n)			ATG (19)	ATG + PTCy (100)	P-value
Recipient Age (Median; IQR)			24 (18 - 34)	26 (17.5 - 34.5)	0.813
Donor Age (Median; IQR)			40 (30 - 48)	32 (23.5 - 40)	0.007
Disease		ALL	7 (36.84%)	36 (36.00%)	0.944
		AML	12 (63.16%)	64 (64.00%)
Gender		Female	5 (26.32%)	34 (34.00%)	0.513
		Male	14 (73.68%)	66 (66.00%)
Donor Sex		Female	14 (73.68%)	55 (55.00%)	0.13
		Male	5 (26.32%)	45 (45.00%)
		Sibling	3 (15.79%)	59 (59.00%)
Relationship		Father	1 (5.26%)	8 (8.00%)	0.001
		Mother	14 (73.68%)	26 (26.00%)
		Offspring	1 (5.26%)	7 (7.00%)
		Matched	14 (73.68%)	54 (54.00%)	0.281
ABO Match		Minor	2 (10.53%)	20 (20.00%)
		Major	3 (15.79%)	26 26.00%)
Disease Status at HSCT		CR1	5 (26.32%)	36 (36.00%)
		Relapsed	13 (68.42%)	48 (48.00%)	0.221
		Refractory	1 (5.26%)	16 (16.00%)
Time to HSCT from diagnosis			18.43 (13.93 - 26.45)	11.55 (8.44 - 17.99)	0.004
(Median; IQR)
MNC.108/kg (Median; IQR)			8.72 (8.3 - 9.45)	8.49 (7.09 - 8.92)	0.094
CD34.106/kg (Median; IQR)			5.3 (3.76 - 6.6)	6 (4.11 - 8.1)	0.23
CD3.106/kg (Median; IQR)			345 (255 - 397)	322 ( 250 - 391)	0.591
Abbreviations: GVHD graft-versus-host disease; ATG anti-thymocyte globulin; PTCy post-transplant
cyclophosphamide; ALL acute lymphoblastic leukemia; AML acute myeloid leukemia; CR complete
remission; MNC mononuclear cell.
