# Supplementary material for: Synergistic Effect of Anti-Thymocyte Globulin Combined with Post-Transplant Cyclophosphamide for Dual T Cell Modulation in Haploidentical Stem Cell Transplantation for Poor Prognosis Acute Leukemia.
Source: Research Square preprint supplement (doi:10.21203/rs.3.rs-523536/v1), 2021-05-27
Supplement: Supplementary file 2 [file 959dbe8463027066868319a1.xlsx]

## Sheet: Sheet1
		Relapse Incidence				NRM Incidence
		Univariable		Multivariable		Univariable		Multivariable
		HR (CI %)	P-value	HR (CI %)	P-value	HR (CI %)	P-value	HR (CI %)	P-value
Recipient Age		0.98 (0.94 - 1.02)	0.354	----	----	1.03 (1.01 - 1.04)	0.001	1.03 (1.00 - 1.04)	0.011
Donor Age		0.99 (0.97 - 1.02)	0.531	----	----	1.02 (1.01 - 1.04)	0.007	1.02 (.99 - 1.04)	0.114
Recipient Gender	Female	Ref.	----	Ref.	----	Ref.	----	Ref.	----
	Male	0.63 (0.32 - 1.24)	0.179	0.66 (0.27 - 1.63)	0.368	0.73 (0.48 - 1.12)	0.149	0.74 (0.46 - 1.18)	0.195
	Sibling	Ref.	----	Ref.	----	Ref.	----	Ref.	----
Relationship	Father	1.06 (0.25 - 4.50)	0.935	0.41 (0.07 - 2.40)	0.324	0.75 (0.35 - 1.65)	0.48	----	----
	Mother	2.02 (0.96 - 4.23)	0.063	2.61 (1.09 - 6.28)	0.032	0.95 (0.61 - 1.48)	0.824	----	----
	Offspring	3.17 (1.00 - 10.03)	0.049	5.35 (1.35 - 21.28)	0.017	1.57 (0.71 - 3.47)	0.262	----	----
Disease Status at HSCT	CR1	Ref.	----	Ref.	----	Ref.	----	Ref.	----
	Relapsed	0.96 (0.43 _ 2.13)	0.911	1.27 (0.46 - 3.54)	0.643	1.64 (1.04 - 2.56)	0.032	2.69 (1.52 – 4.77)	0.001
	Refractory	2.54 (1.06 - 6.06)	0.036	3.90 (1.40 - 10.87)	0.009	0.94 (0.44 - 2.01)	0.864	1.52 (0.63 - 3.68)	0.349
	Matched	Ref.	----	Ref.	----	Ref.	----	Ref.	----
Abo Match	Minor	2.45 (1.07 - 5.61)	0.035	4.34 (1.54 - 12.25)	0.005	1.05 (0.62 - 1.77)	0.866	----	----
	Major	2.32 (1.06 - 5.11)	0.036	1.60 (0.57 - 4.46)	0.368	1.27 (0.79 - 2.03)	0.328	----	----
Cd3		1.00 (.99 - 1.01)	0.416	----	----	0.99 (0.98 - 1.01)	0.739	----	----
CD34		1.13 (1.01 - 1.27)	0.036	1.24 (1.09 - 1.42)	0.001	0.92 (0.84 - 1.00)	0.043	0.85 (0.78 - 0.95)	0.004
Time between diagnosis and HSCT		1.01 (0.98 - 1.04)	0.556	----	----	0.98 (0.96 - 1.00)	0.074	0.96 (0.95 – 1.00)	0.052
Disease	ALL	Ref.	----	Ref.	----	Ref.	----	----	----
	AML	0.39 (0.20 - 0.77)	0.006	0.21 (0.07 - 0.63)	0.005	1.06 (0.71 - 1.61)	0.764	0.49 (0.28 - 0.85)	0.011
aGvHD	No	Ref.	----	Ref.	----	Ref.	----	Ref.	----
	Yes	0.79 (0.41 - 1.56)	0.508	----	----	0.64 (0.42 – 0.95)	0.029	0.62 (0.38 - 1.01)	0.057
Treatment	ATG	Ref.	----	Ref.	----	Ref.	----	Ref.	----
	ATG + PTCy	1.62 (0.55 - 4.78)	0.385	1.53 (0.38 - 6.16)	0.549	1.33 (0.79 - 2.24)	0.281	1.14 (0.62- 2.09)	0.678
