# Supplementary material for: Synergistic Effect of Anti-Thymocyte Globulin Combined with Post-Transplant Cyclophosphamide for Dual T Cell Modulation in Haploidentical Stem Cell Transplantation for Poor Prognosis Acute Leukemia.
Source: Research Square preprint supplement (doi:10.21203/rs.3.rs-523536/v1), 2021-05-27
Supplement: Supplementary file 3 [file aaebfb1642f7d5dfe8dbf53a.xlsx]

## Sheet: Sheet1
		OS% (95% CI)	P value	DFS% (95% CI)	P value
All patients		39.76 (30.03 - 49.30)	----	40.7 (31.01 - 50.15)	----
Treatment, n (%)	ATG	52.63 (28.72 - 71.88)	0.194	52.63 (28.72 - 71.88)	0.239
	PTCY + ATG	37.37 (26.81 - 47.90)		38.66 (28.13 - 49.06)
Disease	ALL	29.91 (16.04 - 45.11)	0.343	30.64 (16.66 - 45.81)	0.351
	AML	45.97 (33.36 - 57.69)		46.92 (34.42 - 58.46)
Gender	Female	25.90 (11.45 - 43.09)	0.076	27.1 (12.3 44.33)	0.082
	Male	45.81 (33.79 - 57.02)		46.61 (34.68 - 57.69)
Donor Sex	Female	36.35 (24.42 - 48.36)	0.2	36.98 (25.06 - 48.91)	0.152
	Male	44.40 (28.22 - 59.39)		45.84 (29.69 - 60.59)
	Sibling	45.17 (30.85 - 58.44)	0.182	45.91 (31.63 - 59.07)
Relationship	Father	46.88 (11.99 - 76.29)		50.00 (15.20 - 77.49)	0.158
	Mother	36.36 (21.36 - 51.54)		36.71 (21.7 - 51.83)
	Offspring	0		14.29 (0.71 - 46.49)
	Matched	48.79 (35.10 - 61.15)	0.316	49.65 (36.1 61.81)	0.284
Abo Match	Minor	31.60 (12.98 - 52.21)		32.13 (13.35 - 52.72)
	Major	28.34 (12.63 - 46.37)		29.09 (13.24 - 47.05)
Disease Status at HSCT	CR1	48.54 (30.62 - 64.32)	0.312	50.04 (32.23 - 65.48)	0.305
	Relapsed dis	33.87 (21.10 - 47.08)		34.52 (21.72 - 47.67)
	Refractory dis	38.96 (16.56 - 61.02)		39.39 (17.02 - 61.26)
